# Supplementary material for: Thermally-driven mesopore formation and oxygen release in delithiated NCA cathode particles
Source: Royal Society of Chemistry journal article supplement (doi:10.1039/c9ta01720h), 2019-01-01
Supplement: c9ta01720h1.xlsx [file c9ta01720h1.xlsx]

## Sheet: baseline_calculation_6%
	Stoichiometry	Li0.3MO2 --> a LiyMOz + b LixMO2 + cO2			TGA mass loss %	0.06		Formula
	x	0.3			Molar Mass	g/mol		0.3 = a*y+b*x
	y	0.3			MW O2	31.998		1 = a + b
	z	1.15			MW Li	6.941		2 = a*z + 2*(b+c)
	RS M ox state	2			MW M (=NCA)	57.1438		--> (2-z-2c)/(2-z) = b
	a	0.402484			MW O	15.999
	b	0.597516			MW Li0.3MO2	91.2241		VNCAx = VNCA0.3 * b * (MW NCAx / MW NCA0.3) * (rho NCA0.3 / rho NCAx)
	c	0.171056			MW LiyMOz	77.6249		Vrs = VNCA0.3 * a * (MW rs / MW NCA0.3) * (rho NCA0.3 / rho rs)
	check: a*y+b*x	0.3			MW LixMO2	91.2241		rho NCAx = ((MW NCAx / MW NCA0.3) * m NCA0.3) / ((100 - Vchange) * VNCA0.3)
					Vchange %	0.04
					Density	g/mL
					LiMO2	4.85
	Volume	Vc0.3 + VNCA0.3 = Vc0.3 heat + VNCAx + Vrs + Vpore			Li0.3MO2	4.79661
	Vc0.3	0.0533			LiyMOz	6.67
	VNCA0.3	0.9467			LixMO2	4.8
	Vc0.3 heat	0.0399
	VNCAx	0.565269
	Vrs	0.233164						Legend
	Vpore	0.161667						yellow	Inputs
								green	Outputs
								NCA0.3	Delithiated NCA to x = 0.3
	Check							NCAx	Delithiated NCA after heating
	Initial mass	VNCA0.3 * rho NCA0.3						Vc0.3	Volume fraction of cracks after delithiation
		4.54095	g/cc-particle					Vc0.3 heat	Volume fraction of cracks after delithiation + heating
	Final mass	VLixMO2 * rho LixMO2 + Vrs * rho rs						Vrs	Volume fraction of rock salt phase (spinel formation neglected)
		4.26849	g/cc-particle					Vpore	Volume fraction of mesopores
	mass loss (%)	0.06	0.06					Vchange	Volume change for NCA grain when delithiated from x = 1 to x = 0.3
