# Supplementary material for: Thermally-driven mesopore formation and oxygen release in delithiated NCA cathode particles
Source: Royal Society of Chemistry journal article supplement (doi:10.1039/c9ta01720h), 2019-01-01
Supplement: c9ta01720h2.pdf [file c9ta01720h2.pdf]

# Thermally-Driven Mesopore Formation and Oxygen Release in Delithiated NCA Cathode Particles

Münir M. Besli<sup>a,b</sup>, Alpesh Khushalchand Shukla<sup>c</sup>, Chenxi Wei<sup>d</sup>, Michael Metzger<sup>a</sup>, Judith Alvarado<sup>e</sup>, Julian Boell<sup>a</sup>, Dennis Nordlund<sup>d</sup>, Gerhard Schneider<sup>b,f</sup>, Sondra Hellstrom<sup>a</sup>, Christina Johnston<sup>a</sup>, Jake Christensen<sup>a</sup>, Marca M. Doeff<sup>e,\*</sup>, Yijin Liu<sup>d,\*</sup>, Saravanan Kuppan<sup>a,\*</sup>

<sup>a</sup>Robert Bosch LLC, Research and Technology Center, Sunnyvale, California 94085, United States

<sup>b</sup>Dept. of Mech. Engineering, Karlsruhe Institute of Technology (KIT), Karlsruhe 76131, Germany

<sup>c</sup>National Center of Electron Microscopy, Molecular Foundry, Lawrence Berkeley National Laboratory, Berkeley, California 94720, United States

<sup>d</sup>Stanford Synchrotron Radiation Lightsource, SLAC National Accelerator Laboratory, Menlo Park, California 94025, United States

<sup>e</sup>Lawrence Berkeley National Laboratory, Energy Storage and Distributed Resources Division, University of California, Berkeley, California 94720, United States

<sup>f</sup>Materials Research Institute, Aalen University, Aalen 73430, Germany

\*Correspondence and requests for materials should be addressed to M.D. (mmdoeff@lbl.gov), Y.L. (liuyijin@slac.stanford.edu), and S.K. (saravanan.kuppan@us.bosch.com)

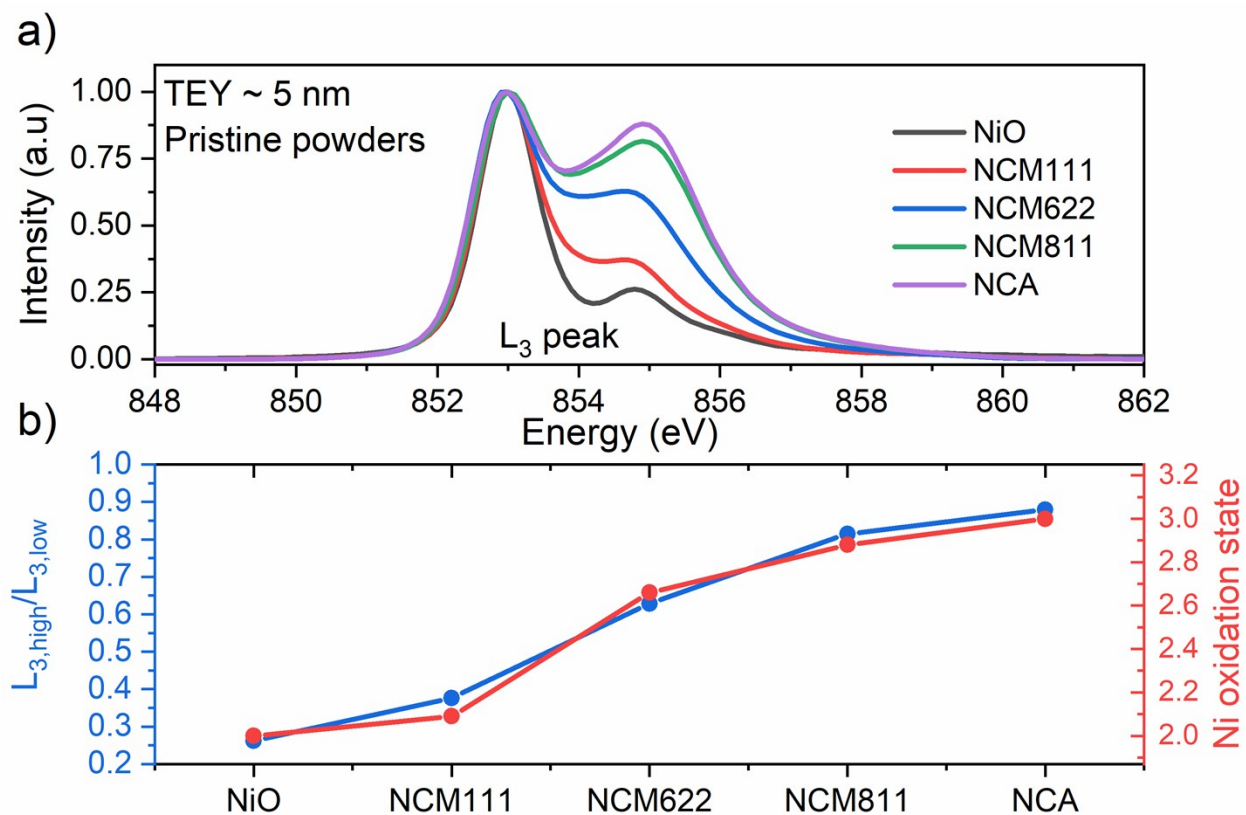

Figure S1: (a) Superimposed soft XAS  $L_{3,high}$  and  $L_{3,low}$  peaks for various cathode active materials of different Ni content. Ni content correlates with  $L_{3,high}$  peak intensity. (b) Correlation of  $L_{3,high}/L_{3,low}$  peak ratio with Ni oxidation state.

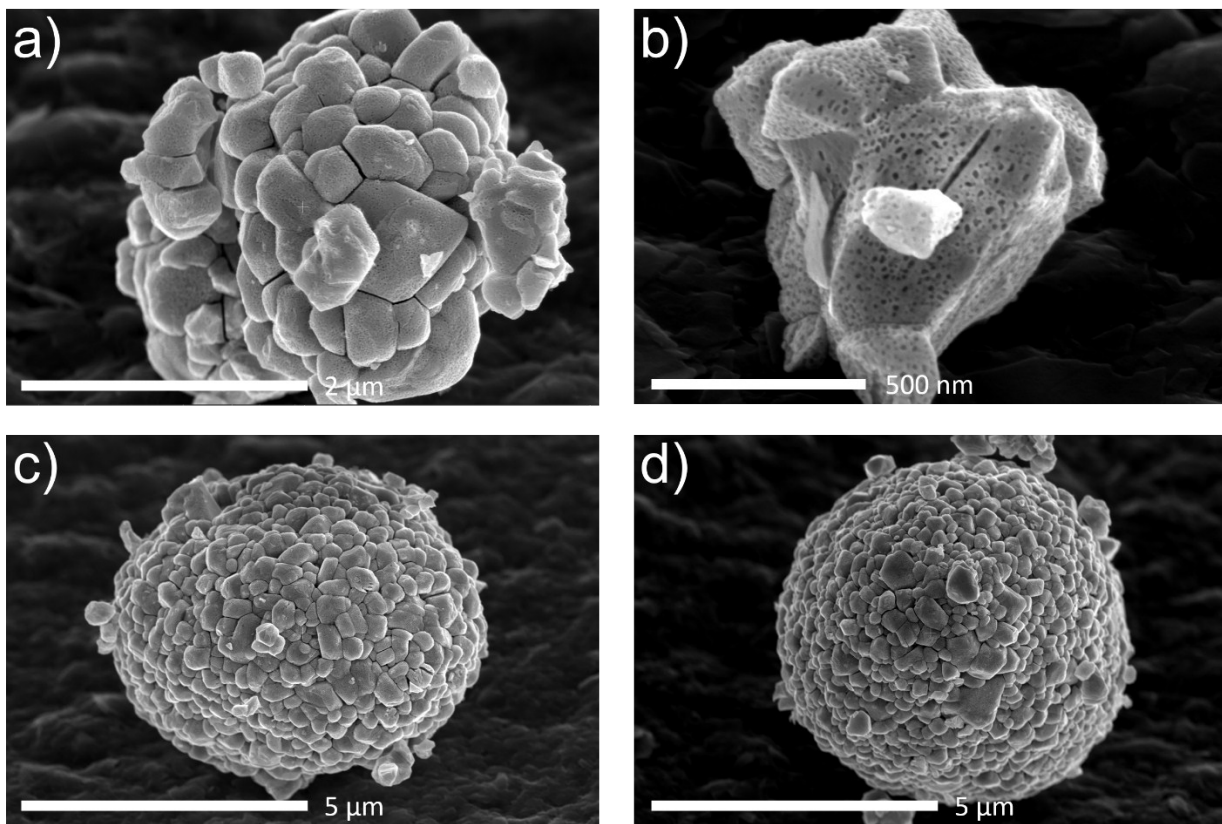

Figure S2: (a-d) Heat-treated  $\text{Li}_{0.3}\text{NCA}$  particles of various sizes showing mesopores on the surface. Independent of particle size, mesopores are homogeneously distributed on the surface of the particles.

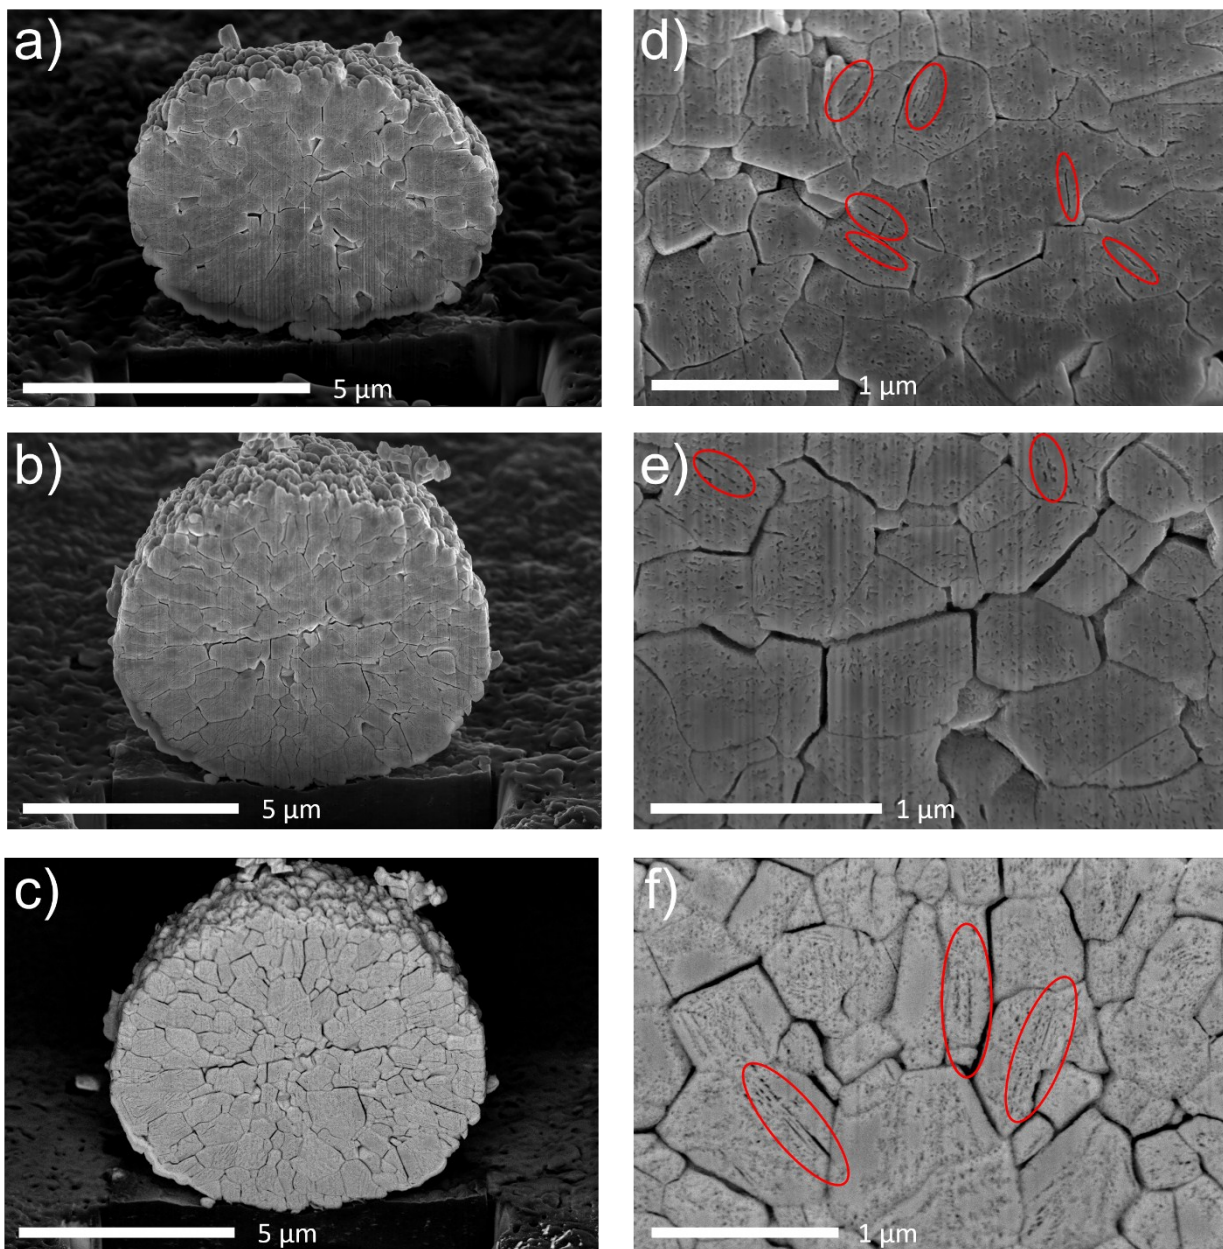

Figure S3: (a-c) Cross-sectional SEM images for four different particles after focused ion beam milling. Cross-sections of particles also indicate a homogenous distribution of mesopores. (d-f) High magnification of cross-sectional images corresponding to the cross-sectional images (a-c). High magnifications show how mesopores appear along intragranular cracks (red circles) and throughout the entire particle.

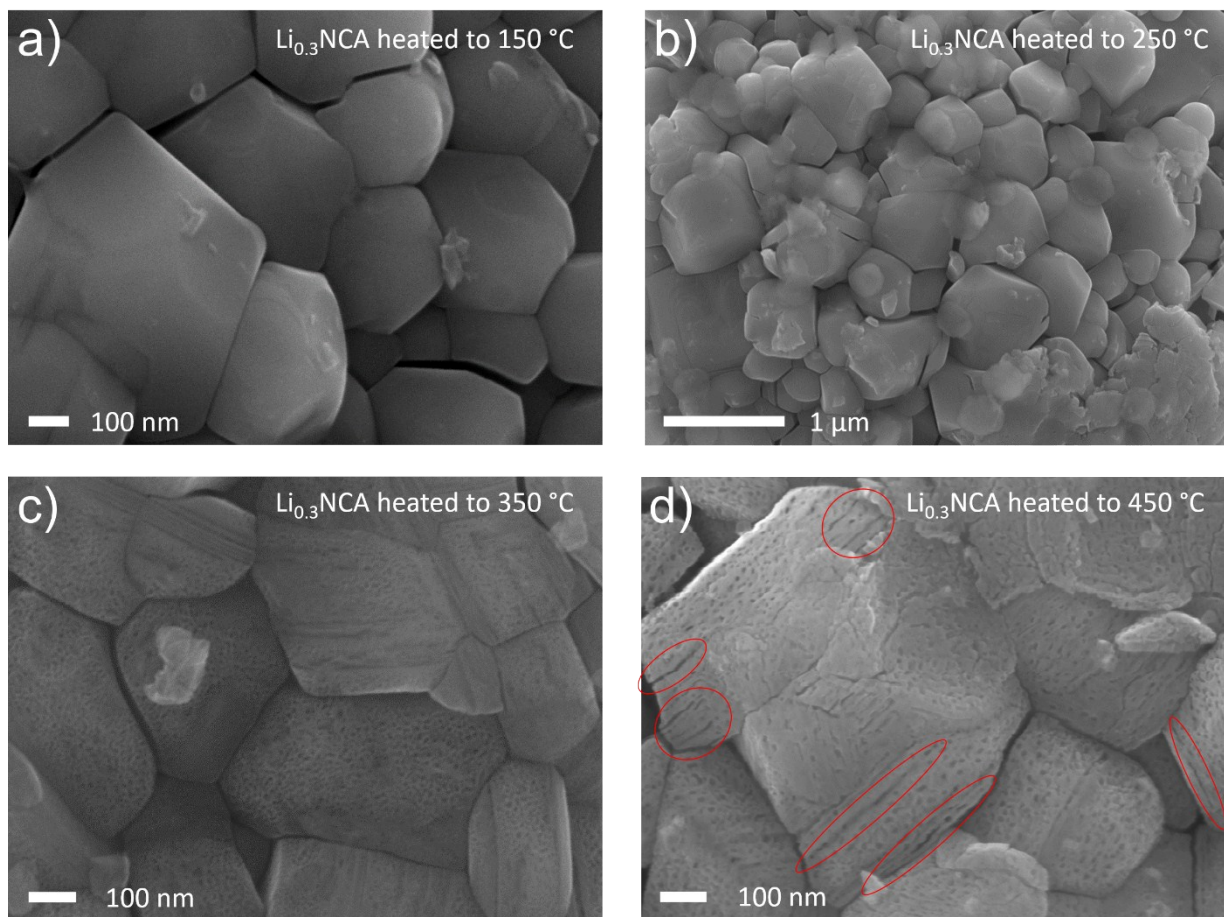

Figure S4: SEM images of the surface of four individual delithiated NCA particle heated to (a) 150 °C, (b) 250 °C, (c) 350 °C, and (d) 450 °C. No mesopores are observed on particles that were heated to 150 or 250 °C. Evolution of mesopores seem to start at temperatures above 300 °C. (d) Mesopores seem to appear along intragranular cracks (red circles).

Video S1: FIB-SEM milling for a delithiated NCA particle.

<https://drive.google.com/open?id=19p0T8S6olhVJ10SBVdG9Jc6xfV2qeU-d>

Video S2: FIB-SEM milling for a delithiated and heat-treated NCA particle.

<https://drive.google.com/open?id=1qvTCIFQ6VG5DJDP rHSb1tH01axGl daDe>



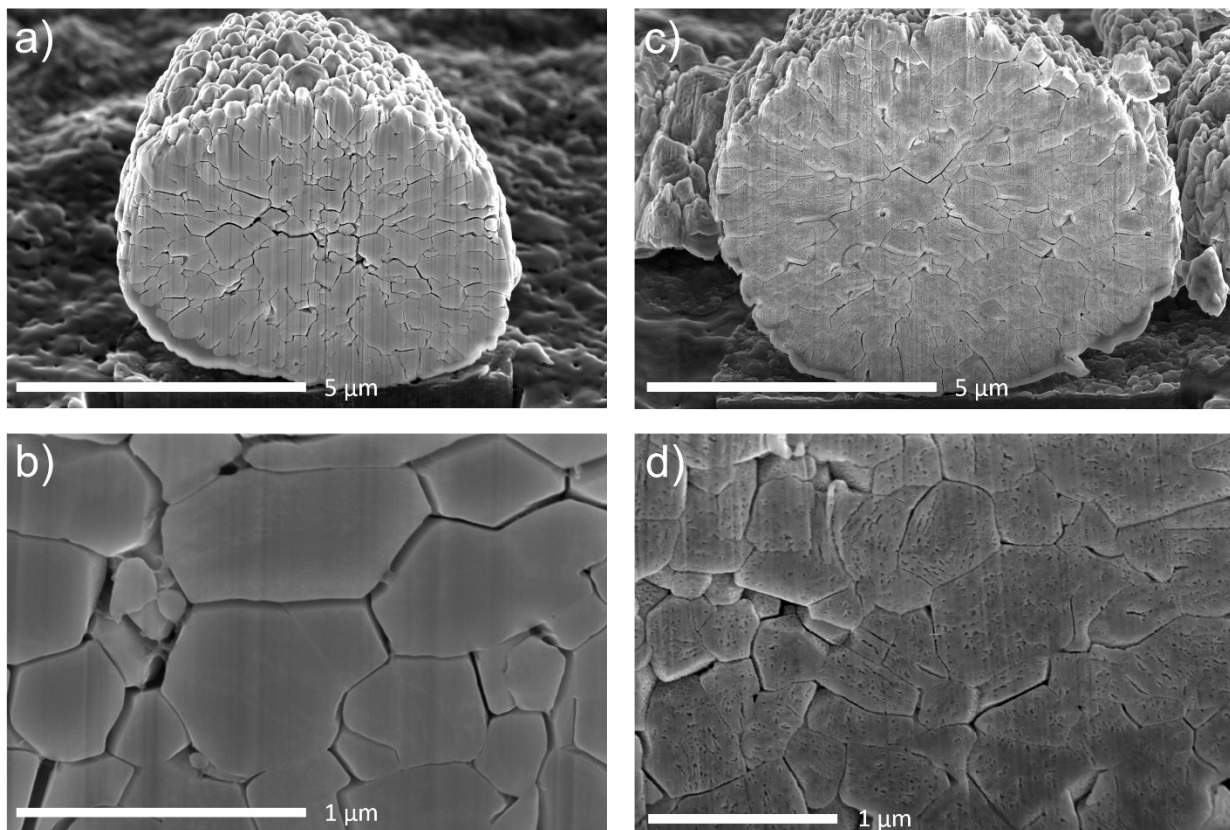

Figure S5: Cross-sectional SEM images for two different particles after focused ion beam milling. (a) Cross-sectional area for a delithiated NCA particle. (b) High magnification of the cross-sectional image shown in (a). (c) Cross-sectional area for a delithiated and heat-treated NCA particle. (d) High magnification of the cross-sectional image shown in (c).
